# Supplementary figures and images for: Survival and Proliferation of Activated Hepatic Stellate Cells Requires REST
Source: Research Square preprint supplement (doi:10.21203/rs.3.rs-6237126/v1), 2025-03-20

Figure 4f


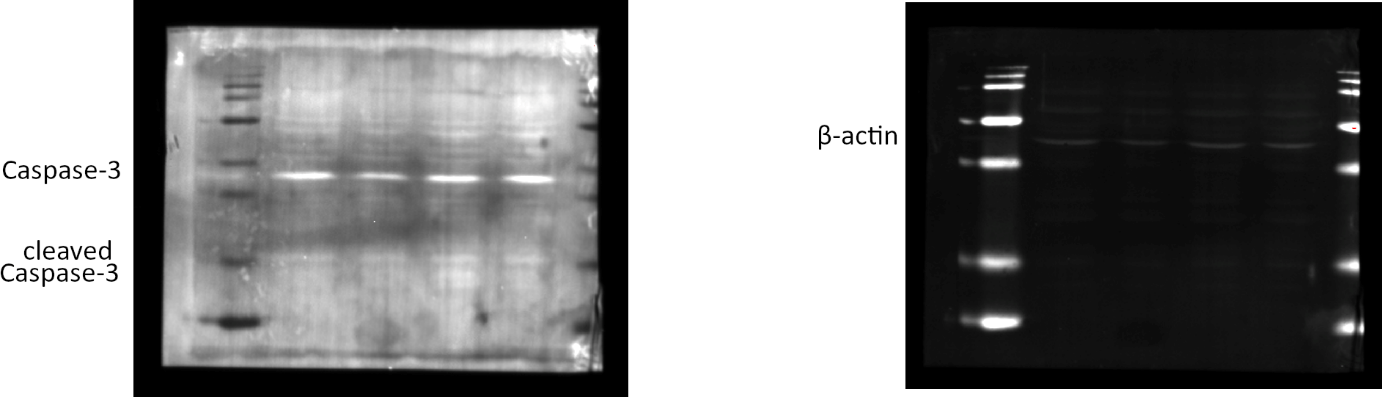


Figure 4i


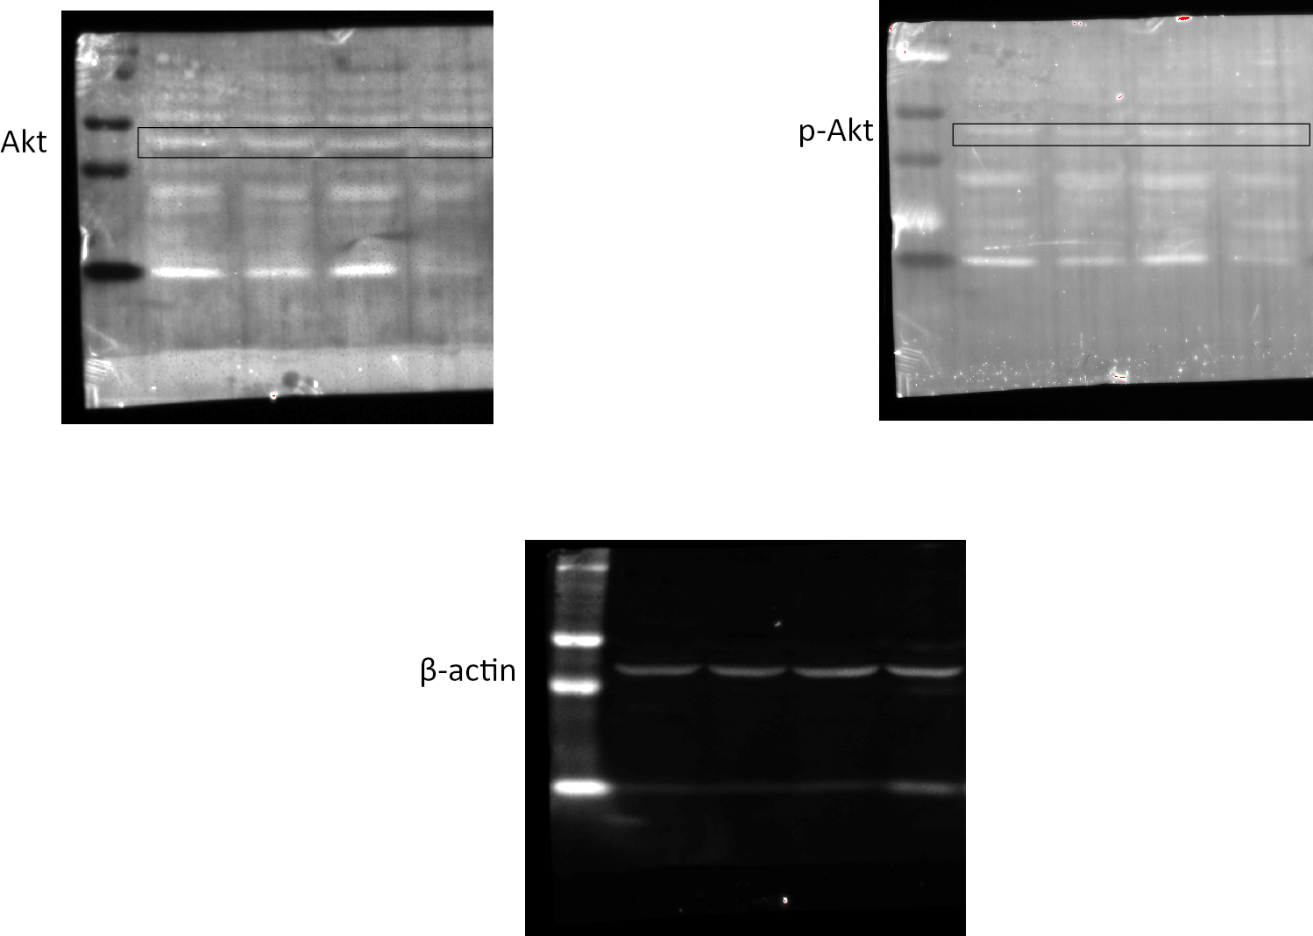


Figure 5i


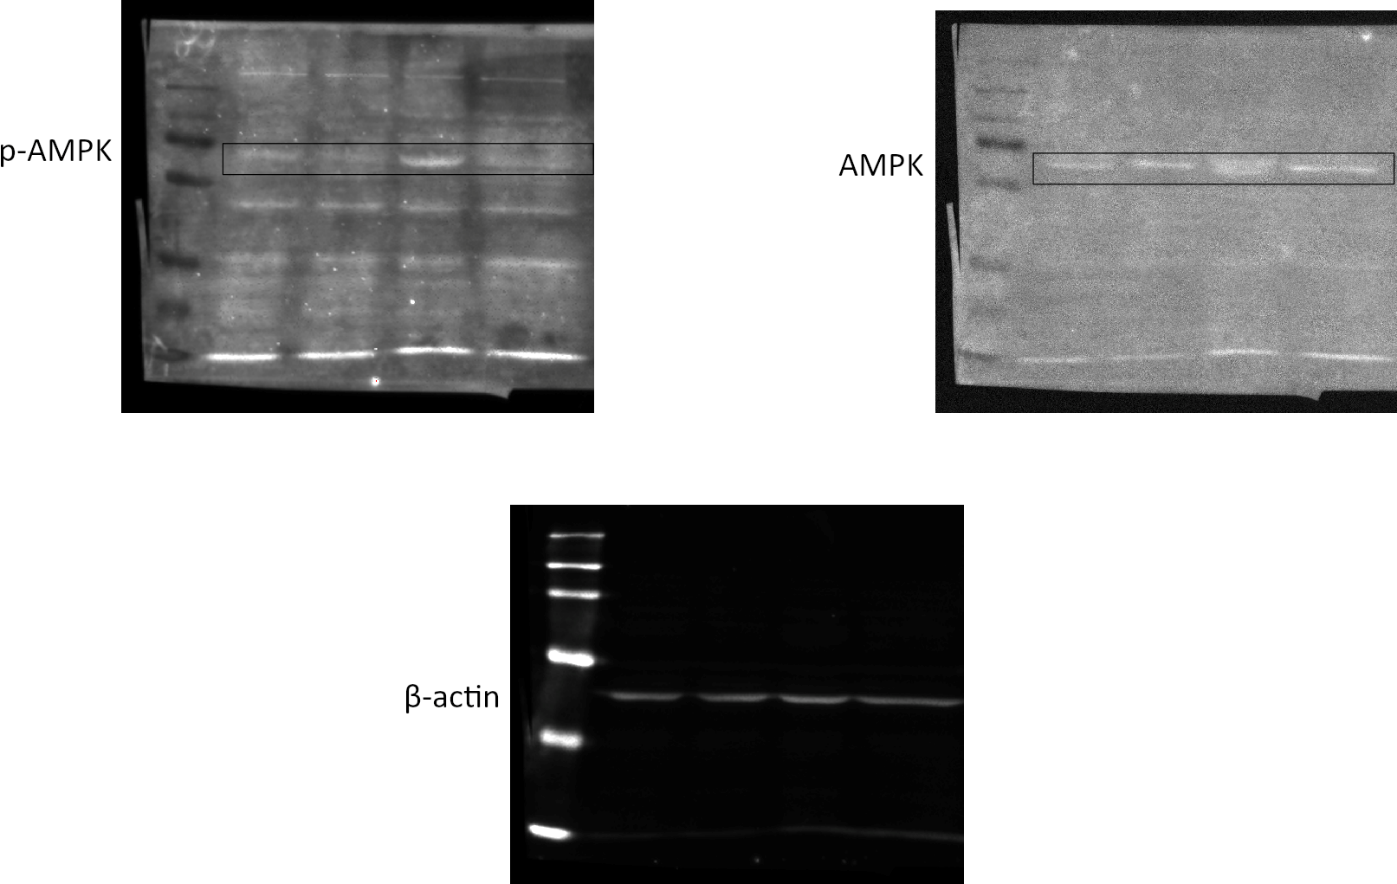


Figure 5n


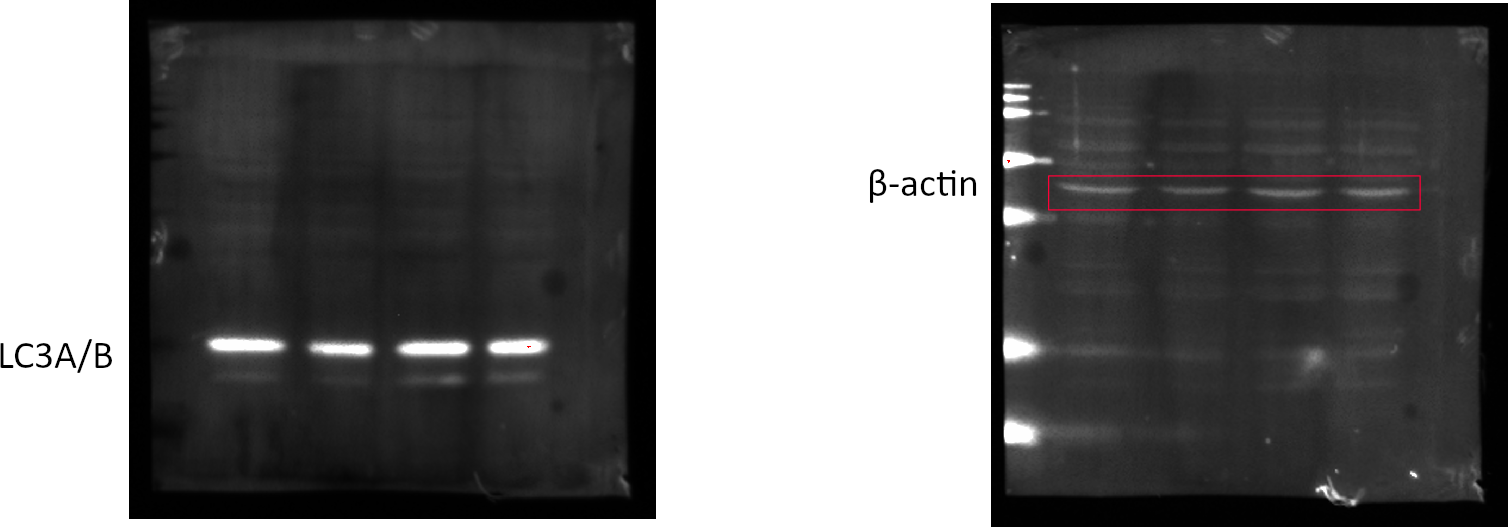


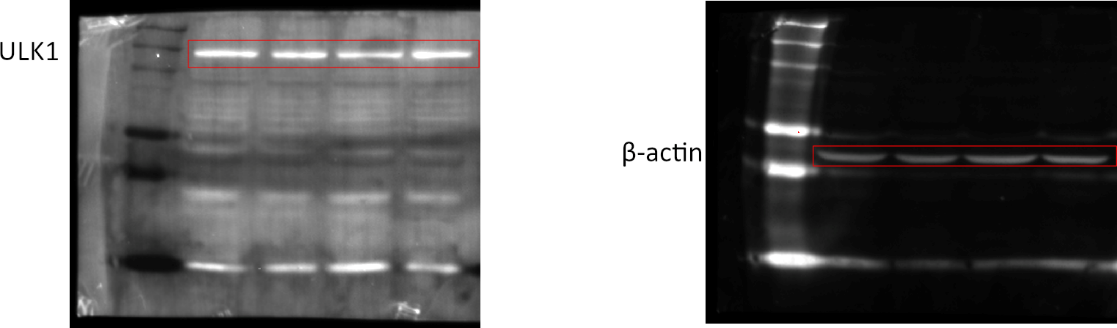


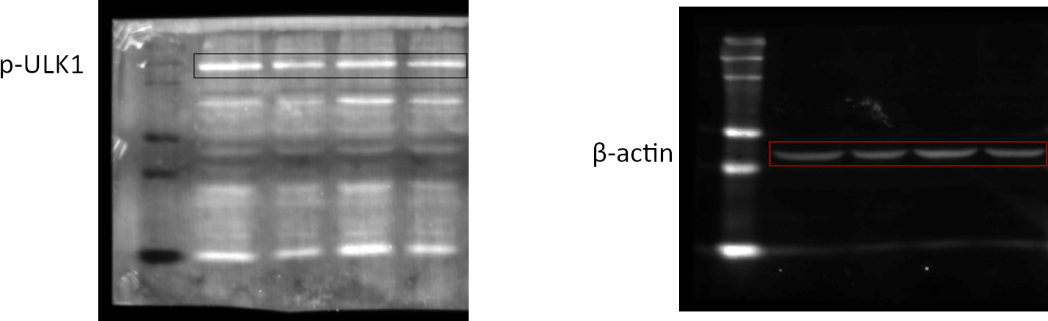

Supplement: Supplementary file 2 [file e3140368e98772deeedc8f6d.docx]
